# Supplementary material for: Reply to the ‘Comment on “Designing potentially singlet fission materials with an anti-Kasha behaviour”’ by K. Jindal, A. Majumdar and R. Ramakrishnan, Phys. Chem. Chem. Phys., 2025, 27, DOI: 10.1039/D4CP02863E
Source: Royal Society of Chemistry journal article supplement (doi:10.1039/d4cp04691a), 2025-01-01
Supplement: d4cp04691a1.pdf [file d4cp04691a1.pdf]

## SUPPORTING INFORMATION

**Reply to the 'Comment on "Designing potentially singlet fission materials with an anti-Kasha behaviour"' by K. Jindal, A. Majumdar and R. Ramakrishnan, Phys. Chem. Chem. Phys., 2025, 27, DOI: 10.1039/D4CP02863E**

Ricardo Pino-Rios<sup>\*a</sup>, Rodrigo Báez-Grez<sup>a,b</sup>, Dariusz W. Szczepanik<sup>c</sup> and Miquel Solà<sup>\*d</sup>

<sup>a</sup> *Instituto de Ciencias Exactas y Naturales (ICEN), Universidad Arturo Prat, Playa Brava 3256, 1111346, Iquique, Chile. rpinorios@unap.cl.*

<sup>b</sup> *Facultad de Ciencias, Universidad Arturo Prat, Casilla 121, Iquique 1100000, Chile.*

<sup>c</sup> *K. Guminski Department of Theoretical Chemistry, Faculty of Chemistry, Jagiellonian University, Poland.*

<sup>d</sup> *Institut de Química Computacional i Catàlisi (IQCC) and Departament de Química, Universitat de Girona, C/ Maria Aurèlia Capmany 69, 17003 Girona, Catalonia, Spain. miquel.sola@udg.edu*

**Table S1.** Excitation energies for the ghost states computed at the TD-LC- $\omega$ HPBE/6-311G(d,p)//B3LYP/6-311G(d,p) level for substituted azulenes.

| Position <sup>a</sup> | Ghost state energy (cm <sup>-1</sup> ) | Position <sup>a</sup> | Ghost state energy (cm <sup>-1</sup> ) |
|-----------------------|----------------------------------------|-----------------------|----------------------------------------|
| Azulene               | 1692.8                                 | OH8b                  | -3029.2                                |
| CN1                   | 4881.7                                 | OH12a                 | 8286.8                                 |
| CN2                   | 3550.2                                 | OH12b                 | 9337.7                                 |
| CN6                   | -5789.9                                | OH13                  | -3438.1                                |
| CN7                   | -3700.2                                | OH48                  | -4071.2                                |
| CN8                   | -5972.9                                | OH56a                 | 3769.6                                 |
| CN12                  | 5473.7                                 | OH56b                 | 12846.7                                |
| CN13                  | 7100.4                                 | OH57                  | 5429.4                                 |
| CN47                  | -7191.6                                | OH58                  | 2767.9                                 |
| CN48                  | -8209.4                                | OH68                  | 3893.8                                 |
| CN57                  | -4902.7                                | OH78                  | 5301.9                                 |
| CN67                  | -6621.4                                | OH123                 | 11790.2                                |
| CN68                  | -7870.6                                | OH456                 | 6045.5                                 |
| CN78                  | -6965.7                                | OH457a                | -5286.6                                |
| CN123                 | 7196.4                                 | OH458a                | 10194.2                                |
| CN457                 | -7632.7                                | OH467                 | 7014.1                                 |
| CN458                 | -8939.2                                | OH468                 | 10569.2                                |
| CN467                 | -8596.5                                | OH478                 | 9309.4                                 |
| CN468                 | -9350.6                                | OH567                 | 16283.2                                |
| CN567                 | -7098.8                                | OH568                 | 10894.2                                |
| CN678                 | -8460.2                                | OH578                 | 1467.8                                 |
| CN4578                | -9290.1                                | OH678                 | 11241.0                                |
| CN4678                | -9879.6                                | OH4567                | 4981.8                                 |
| CN5678                | -8874.7                                | OH4568a               | 8682.8                                 |
| CN45678               | -10149.8                               | OH4578                | 7422.2                                 |
| OH1a                  | 417.0                                  | OH4678                | 12785.4                                |
| OH1b                  | -3658.3                                | OH5678                | 7704.5                                 |
| OH2                   | 1654.9                                 | OH45678               | 13359.7                                |
| OH6a                  | 7829.5                                 |                       |                                        |

<sup>a</sup> In the OH-substituted compounds, isomers a and b are observed; these are relative to the position of the hydrogen in -OH but do not change considerably the final result.
